# Supplementary material for: Análisis comparativo de cinco teorías sobre el desarrollo moral
Source: Royal Society of Chemistry journal article supplement (doi:10.1039/c2cc35659g), 2005-01-01
Supplement: c2cc35659g.pdf [file c2cc35659g.pdf]

## Supporting Information

### Mesostructured Y Zeolite as Superior FCC Catalyst -- From Lab to Refinery

Javier Garcia-Martinez,<sup>\*a,b</sup> Kunhao Li<sup>a</sup> and Gautham Krishnaiah<sup>a</sup>

<sup>a</sup> Rive Technology, Inc., Monmouth Junction, New Jersey, USA; <sup>b</sup> University of Alicante, , Alicante, Spain.  
E-mail: j.garcia@ua.es

#### Zeolite Preparation:

A slurry of NH<sub>4</sub>Y in water was treated with a citric acid solution for 1 hour at room temperature. The acid treated material is then treated with a CTAB solution in NH<sub>4</sub>OH to introduce mesoporosity. In order to convert the mesostructured NH<sub>4</sub>Y to a typical USY, the mesostructured zeolite was calcined at 550-600 °C in a “deep-bed” fashion in a rotary kiln, followed by ammonium exchange. The zeolite was then mixed with rare earth salt (mainly lanthanum chloride), clay and binder, spray-dried, and calcined to produce the final FCC catalyst. The details of the manufacturing process of the mesostructured zeolite and the catalyst are proprietary.

#### Characterization:

Gas (argon and nitrogen) adsorption–desorption isotherms were measured on Quadrasorb-SI surface area/pore size analyzers from Quantachrome Instruments. Samples were activated at 400 °C under vacuum overnight before measurements. A NLDFT model was used to obtain pore size distribution from the adsorption branches of the argon isotherms. Surface areas were determined by nitrogen adsorption following ASTM D4365. X-Ray diffraction patterns were collected on a PANalytical Cubix Pro (PW3800) industrial X-ray diffractometer with a 1.8 kW Cu-target X-ray tube and the %XRD and UCS of the samples were determined following ASTM D 3906 and D3942. Samples were hydrated inside a closed chamber with saturated CaCl<sub>2</sub> aqueous solution overnight before analysis. Silicon powder was added as an internal standard. For TEM analysis, the samples (5–10 mg) were sonicated in ethanol solution and the resulting suspensions were dispersed on carbon film supported 200 mesh copper grids. The digital analysis of the TEM micrographs was done using DigitalMicrograph TM 3.6.1 by Gatan.

#### ACE<sup>®</sup> Testing:

The FCC catalysts were tested at the Technical Center of W. R. Grace & Company, Columbia, MD, using an ACE unit from Xytel and Kayser Technologies. The ACE unit was an automated fluidized bed widely accepted in the FCC industry. The reactor was fluidized with a stream of nitrogen. In these studies, the feed is flown over the catalyst at a rate of 3.2 g min<sup>-1</sup> over 30 s. Different amounts of catalyst were fluidized and stabilized at a reaction temperature of 980 °F to achieve different catalyst/oil ratios. After the reaction, the catalyst was stripped by nitrogen to remove the adsorbed products. Coke on the catalyst was determined by a off-line carbon analyzer. Simulated distillation and on-line gas chromatography were used to determine the liquid and gaseous products, respectively.

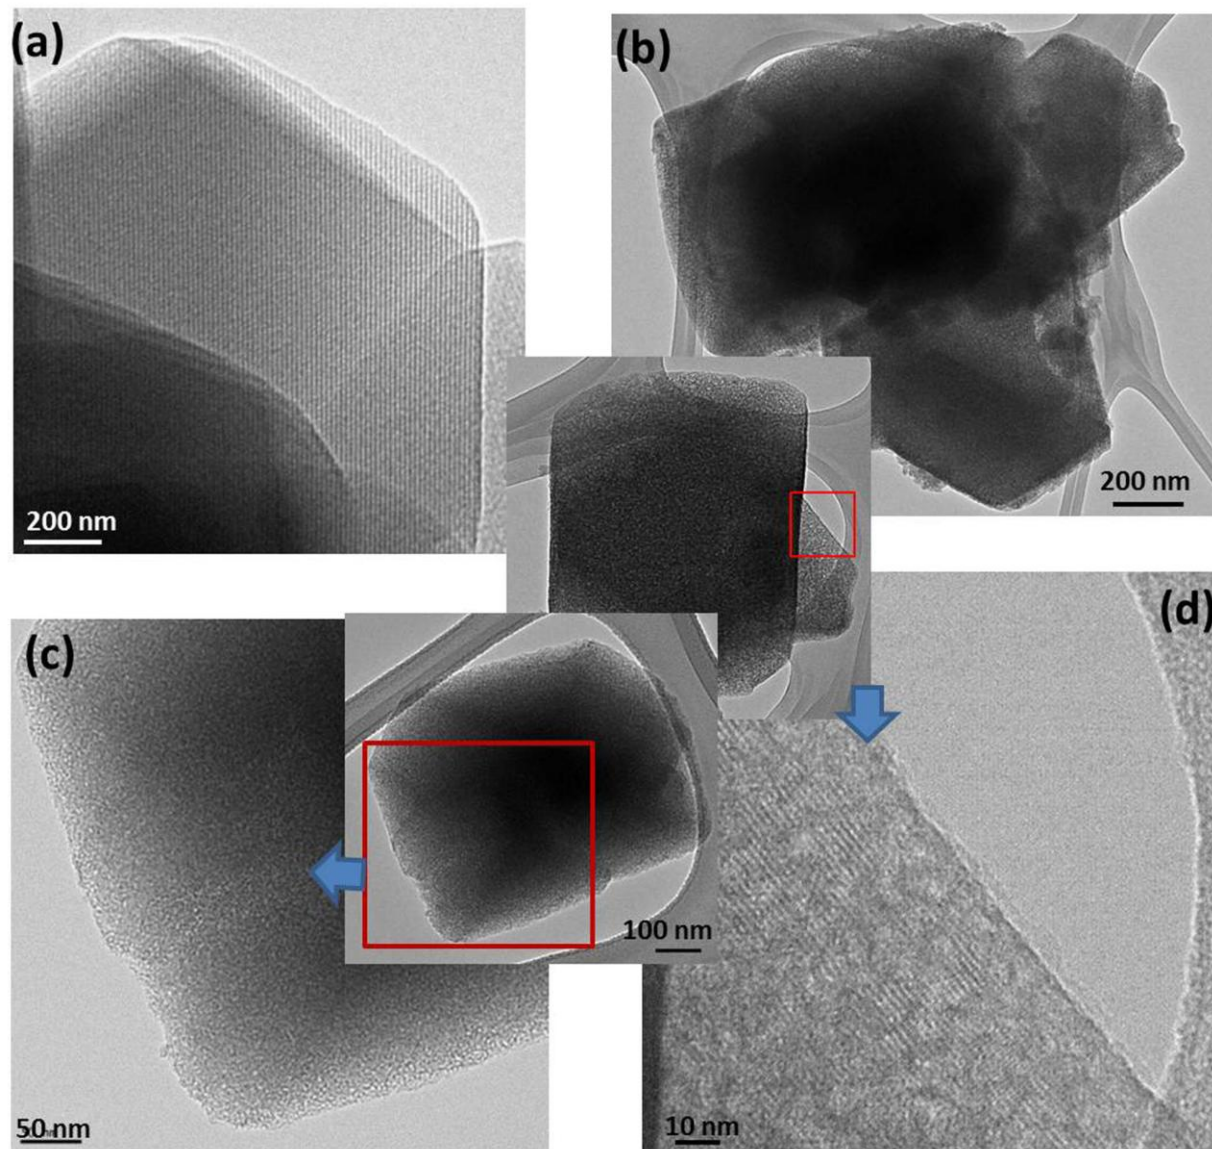

**Figure S1** TEM images of (a) the starting NaY, (b, c & d) mesostructured Y zeolites at various magnifications (c & d are the close-up images of the red-boxed regions of the corresponding crystals, which clearly show the co-existence of the mesopores and the crystal lattice fringe lines).

**Table S1** Physicochemical properties of mesostructured ultra-stabilized Y (USY) zeolites, the incumbent catalyst and the experimental catalyst GRX-3 before and after being steamed at 1450 °F (788 °C) in 100% steam for 8 hours.

|                                         | %XRD* | UCS (Å) | SAR | ZSA (m <sup>2</sup> /g) | MSA (m <sup>2</sup> /g) | Pore Volume 0-20 Å (cc/g) | Pore Volume 20-300 Å (cc/g) |
|-----------------------------------------|-------|---------|-----|-------------------------|-------------------------|---------------------------|-----------------------------|
| Meso USY                                | 59    | 24.48   | 6.7 | 489                     | 172                     | 0.29                      | 0.13                        |
| Steamed Meso USY                        | 41    | 24.27   | 6.7 | 364                     | 105                     | 0.17                      | 0.15                        |
| Fresh Incumbent Catalyst                | 23    | 24.53   | 2.1 | 235                     | 50                      | n/a                       | n/a                         |
| Fresh GRX-3                             | 28    | 24.43   | 2.1 | 250                     | 100                     | n/a                       | n/a                         |
| Steamed Incumbent Catalyst              | 18    | 24.27   | 2.1 | 133                     | 47                      | n/a                       | n/a                         |
| Steamed GRX-3                           | 17    | 24.26   | 2.1 | 121                     | 60                      | n/a                       | n/a                         |
| Incumbent Equilibrium Catalyst          | n/a   | n/a     | n/a | 112                     | 31                      | n/a                       | n/a                         |
| Trial Equilibrium Catalyst <sup>#</sup> | n/a   | n/a     | n/a | 121                     | 50                      | n/a                       | n/a                         |

\* A Zeolyst USY (CBV500) was used as crystallinity standard. The meso USY contains ~3% rare earth oxide, which diminishes the "apparent" crystallinity due to strong X-ray absorption.

# At the end of the trial, there was ~66% change-out, i.e. ~66% of the equilibrium catalyst is GRX-3 and the rest is incumbent.

**Table S2** Physicochemical properties of the CountryMark feed to the FCC Unit.

|                        |       |                                   |      |
|------------------------|-------|-----------------------------------|------|
| API                    | 24.7  | <b>Initial Boiling Point (°F)</b> | 527  |
| Specific Gravity       | 0.906 | <b>5%</b>                         | 651  |
| Total Nitrogen, %      | 0.14  | <b>10%</b>                        | 691  |
| Basic Nitrogen, %      | 0.046 | <b>20%</b>                        | 734  |
| Ca                     | 17.6  | <b>30%</b>                        | 773  |
| Cn                     | 20.3  | <b>40%</b>                        | 810  |
| Cp                     | 62.1  | <b>50%</b>                        | 848  |
| Conradson Carbon (CCR) | 0.32  | <b>60%</b>                        | 886  |
| K Factor               | 12.01 | <b>70%</b>                        | 928  |
| Refractive Index       | 1.504 | <b>80%</b>                        | 976  |
| Sulfur, %              | 0.35  | <b>90%</b>                        | 1045 |
|                        |       | <b>95%</b>                        | 1108 |
|                        |       | <b>Final Boiling Point (°F)</b>   | 1259 |

**Table S3** Profitmatics<sup>®</sup> predicted yields comparison based on ACE testing results of lab deactivated CountryMark incumbent catalyst and GRX-3 catalyst (compared at constant coke of 4.5 wt%).

|                                        | <b>Incumbent</b> | <b>Rive GRX-3</b> | <b>Delta</b> |
|----------------------------------------|------------------|-------------------|--------------|
| <b>Conversion</b>                      | 77.5             | 78.4              | 0.9          |
| <b>Catalyst to Oil Ratio</b>           | 6.3              | 6.6               | 0.3          |
| <b>Dry Gas, wt%</b>                    | 1.8              | 1.8               | 0            |
| <b>LPG, wt%</b>                        | 12.9             | 14.1              | 1.2          |
| <b>Gasoline, wt%</b>                   | 58.3             | 58.0              | -0.3*        |
| <b>LCO, wt%</b>                        | 17.6             | 17.4              | -0.2*        |
| <b>Bottoms, wt%</b>                    | 4.9              | 4.2               | -0.7         |
| <b>Coke, wt%</b>                       | 4.5              | 4.5               | 0            |
| <b>Riser Top Temperature, °F</b>       | 935              | 935               | 0            |
| <b>Feed Temperature to Riser, °F</b>   | 546              | 546               | 0            |
| <b>Regenerator Bed Temperature, °F</b> | 1242             | 1231              | -11          |

\*The deficit in gasoline and LCO is attributed to the ZSM-5 in the formulation of GRX-3.

**Table S4** DCR<sup>®</sup> testing results of the equilibrium catalyst samples withdrawn from CountryMark FCCU right before and at the end of the trial (compared at constant coke yield).

|                            | <b>Incumbent</b> | <b>GRX-3</b> | <b>Delta</b> |
|----------------------------|------------------|--------------|--------------|
| <b>Catalyst Change-Out</b> | 0%               | 66%          |              |
| <b>Conversion</b>          | 76.2             | 76.3         | 0.1          |
| <b>Yields, wt%:</b>        |                  |              |              |
| <b>Dry Gas</b>             | 1.7              | 1.7          | 0            |
| <b>LPG</b>                 | 16.0             | 16.7         | 0.7          |
| <b>Gasoline</b>            | 54.6             | 54.0         | -0.6         |
| <b>LCO</b>                 | 18.1             | 18.4         | 0.3          |
| <b>Bottoms</b>             | 5.7              | 5.3          | -0.4         |
| <b>Coke</b>                | 3.9              | 3.9          | 0            |

**Table S5** Brief information about CountryMark Refinery and FCCU and the trial of Rive GRX-3 catalyst.

|                               |                  |
|-------------------------------|------------------|
| <b>Refinery Throughput</b>    | 27,000 BPSD      |
| <b>Refinery Crude</b>         | Illinois Basin   |
| <b>FCC Feed Type</b>          | VGO              |
| <b>FCC Unit Feed Rate</b>     | 7,400 BPSD       |
| <b>Catalyst Addition Rate</b> | 0.7 tons/day     |
| <b>Unit Inventory</b>         | 45 tons          |
| <b>Objective</b>              | LCO Maximization |
| <b>Trial Duration</b>         | ~70 days         |
